# Supplementary material for: Stepwise self-assembly of a block copolymer–platinum(ii) complex hybrid in solvents of variable quality: from worm-like micelles to free-standing sheets to vesicle-like nanostructures
Source: Royal Society of Chemistry journal article supplement (doi:10.1039/c7sm01055a), 2017-01-01
Supplement: c7sm01055a1.pdf [file c7sm01055a1.pdf]

## Electronic Supplementary Information

### Stepwise self-assembly of a block copolymer-platinum(II) complex hybrid in solvents of variable quality: From wormlike micelle to free-standing sheet to vesiclelike nanostructure

Nijuan Liu, Qun He, Yongyue Wang and Weifeng Bu\*

Key Laboratory of Nonferrous Metals Chemistry and Resources Utilization of Gansu Province, State Key Laboratory of Applied Organic Chemistry, and College of Chemistry and Chemical Engineering, Lanzhou University, Lanzhou City, Gansu Province, China

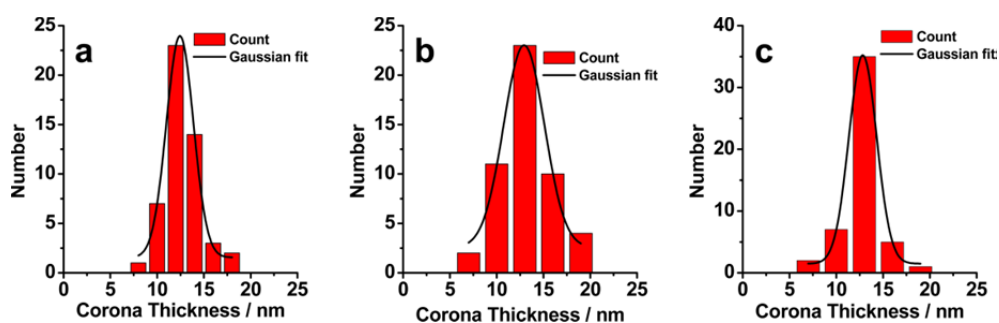

**Fig. S1.** The corona thicknesses of the vesiclelike nanostructures and sheets were fitted to  $12 \pm 2$  (90 vol %, BF-TEM),  $13 \pm 3$  (90 vol %, HAADF-STEM), and  $13 \pm 2$  nm (50 vol %) by counting 50 coronas.

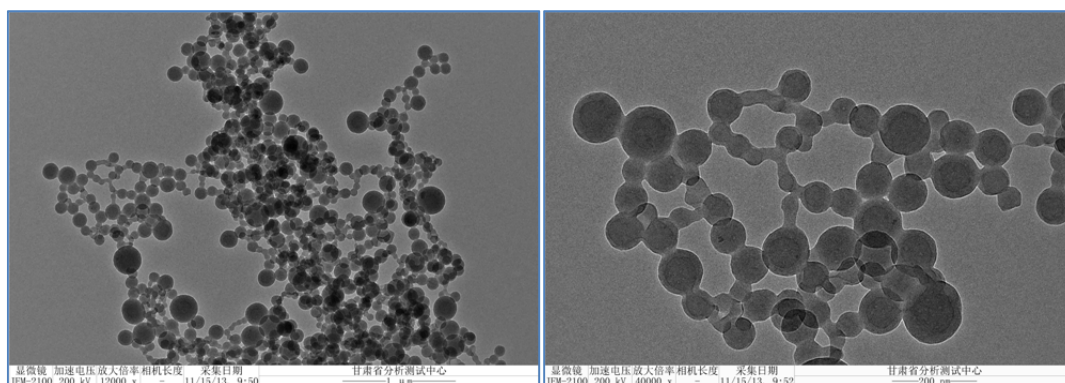

**Fig. S2.** TEM images of the precipitate of SAPt-1 obtained from the toluene/methanol mixture solvent with a methanol volume ratio of 90%.

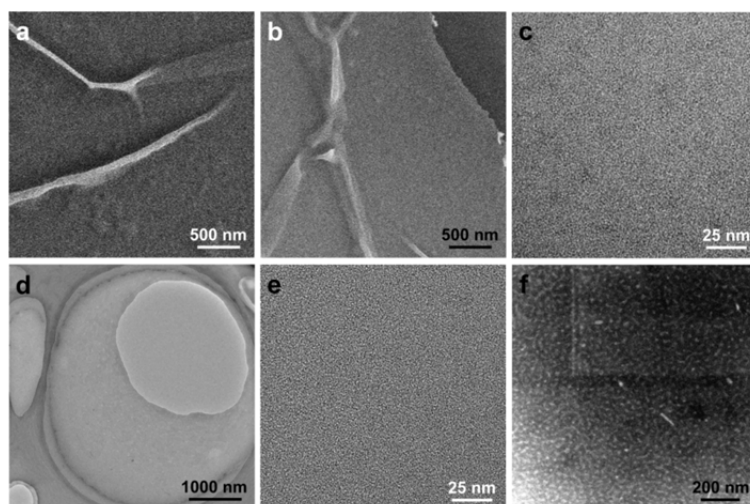

**Fig. S3.** SEM and TEM images of SAPt-1 obtained from the toluene/methanol mixture solvents with methanol volume ratios of 33 (a–c) and 67% (d–f).

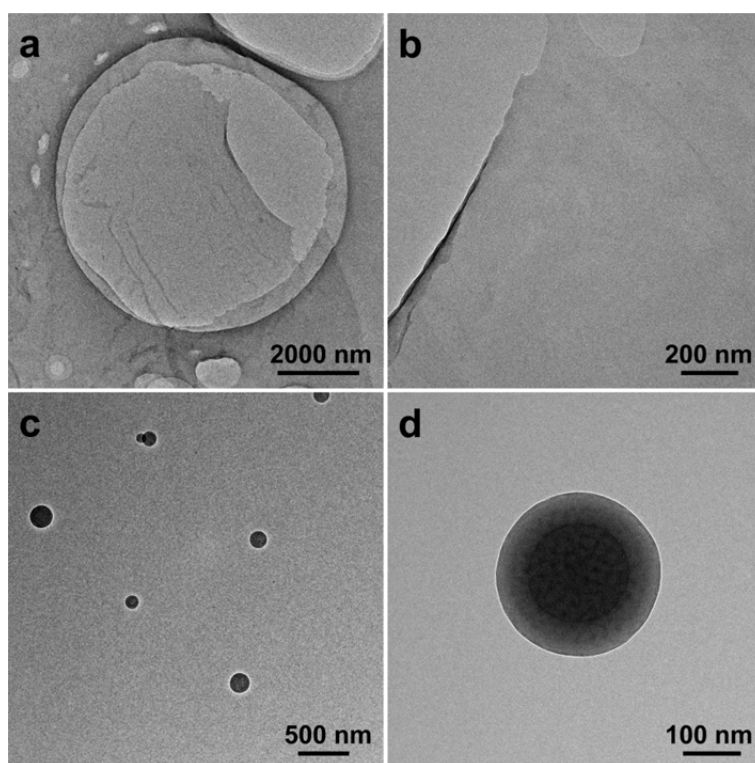

**Fig. S4.** The dispersions were also prepared by layering methanol into the toluene solution of SAPt-1 with methanol volume ratios of 50% (a and b) and 90% (c and d). During this procedure, the methanol was added extremely slowly to the polymer solution. Again, the precipitates emerged within 10 min. They were also cast onto carbon-coated copper grids and copper grids coated with a porous polymer membrane for TEM observations. The resulting TEM images showed that the sheet- and vesicle-like nanostructures formed with similar sizes, respectively. These results indicated that the rate of methanol addition did not influence the formation of nanostructures in the present case. This situation is different from the self-assembly process of amphiphilic block copolymers in selective solvents, presumably due to their different formation mechanism of the self-assembled nanostructures.
